# Supplementary material
Source: PubMed Central journal article supplement (PMC3614147)
Supplement: 11606_2012_2200_MOESM1_ESM.pdf [file 11606_2012_2200_MOESM1_ESM.pdf]

Appendix Figure 1: Algorithm for Cohort Creation

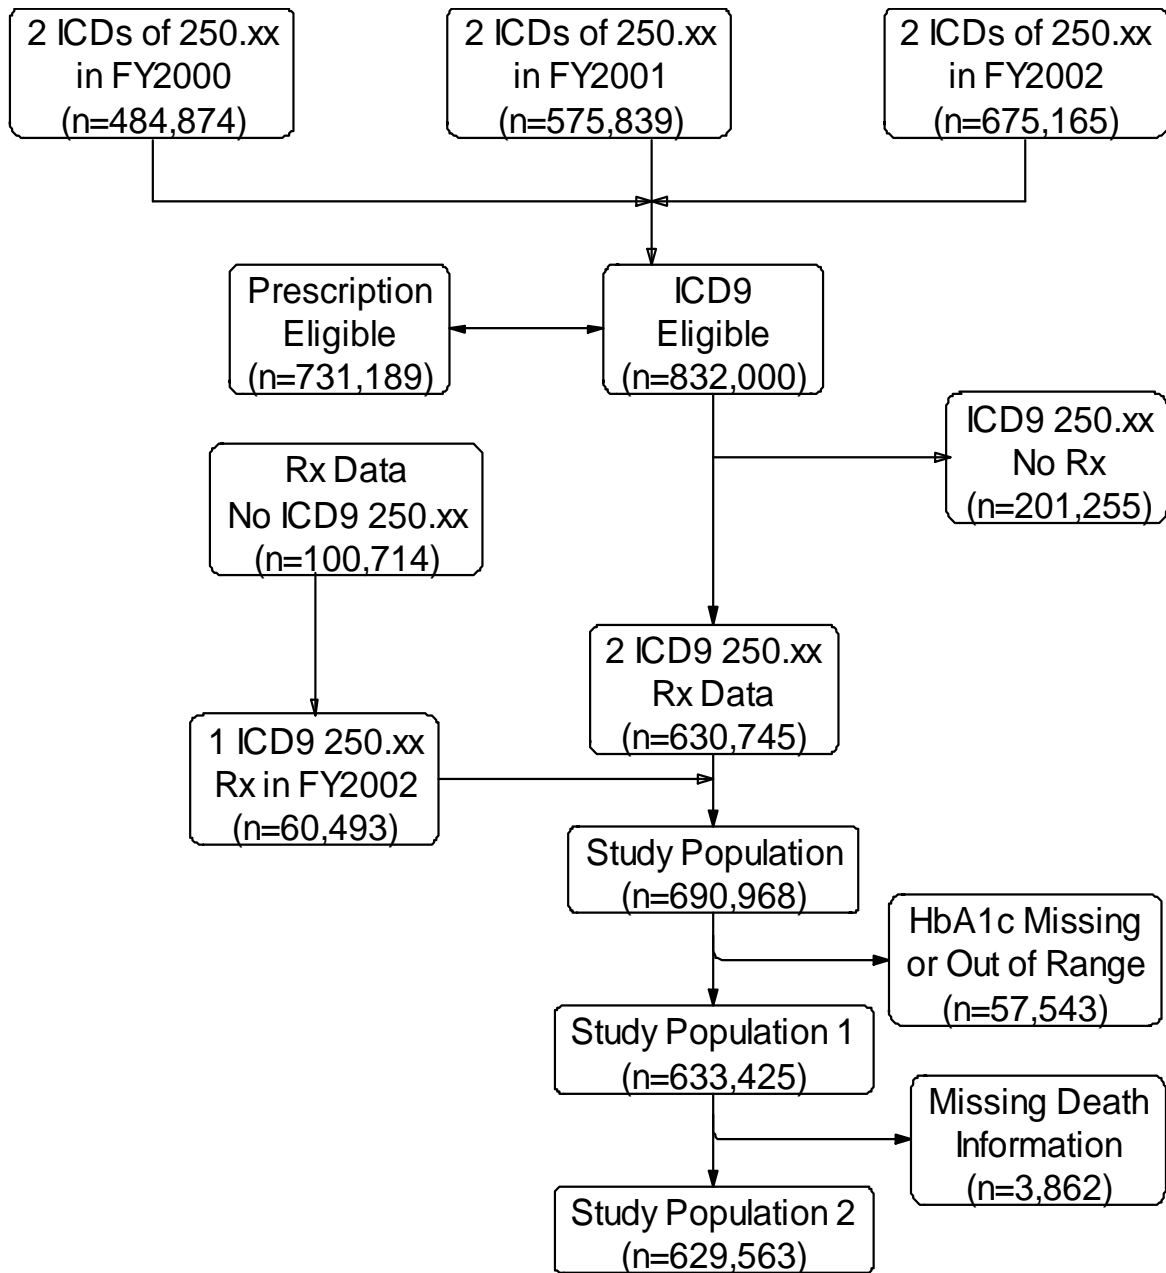

Appendix Table 1. Adjusted hazard rate ratios (and 95% CI) for all-cause mortality from a multivariate Cox model for a given difference in risk factor level stratified by race/ethnicity.

| Variable                        | NHW   |               | NHB   |             | Hispanic |               | Other |              | Missing |              |
|---------------------------------|-------|---------------|-------|-------------|----------|---------------|-------|--------------|---------|--------------|
|                                 | HR    | 95% CL        | HR    | 95% CL      | HR       | 95% CL        | HR    | 95% CL       | HR      | 95% CL       |
| <b>MPR Quintile</b>             |       |               |       |             |          |               |       |              |         |              |
| MPR: 0-49.2%                    | 12.41 | (12.08,12.75) | 10.46 | (9.6,11.39) | 13.13    | (11.52,14.97) | 7.38  | (5.35,10.17) | 11.29   | (9.68,12.26) |
| MPR: 49.3-68.6%                 | 8.00  | (7.78,8.22)   | 5.48  | (5.02,5.98) | 7.61     | (6.66,8.7)    | 4.23  | (3.03,5.9)   | 6.62    | (5.65,8.64)  |
| MPR: 68.7-83.7%                 | 3.48  | (3.38,3.59)   | 2.32  | (2.11,2.55) | 3.11     | (2.69,3.58)   | 1.96  | (1.34,2.85)  | 2.73    | (2.3,3.74)   |
| MPR: 83.8-94.1%                 | 1.15  | (1.11,1.19)   | 1.03  | (0.92,1.15) | 1.14     | (0.96,1.35)   | 0.82  | (0.52,1.29)  | 0.84    | (0.68,1.28)  |
| Highest Quintile                | 1.00  |               | 1.00  |             | 1.00     |               | 1.00  |              | 1.00    |              |
| <b>Medication Class</b>         |       |               |       |             |          |               |       |              |         |              |
| Oral Agents                     | 1.00  |               | 1.00  |             | 1.00     |               | 1.00  |              | 1.00    |              |
| Insulin                         | 1.02  | (1.01,1.03)   | 1.05  | (1.02,1.09) | 1.23     | (1.16,1.3)    | 1.25  | (1.06,1.48)  | 1.15    | (1.06,1.09)  |
| Insulin + Oral                  | 0.75  | (0.74,0.76)   | 0.70  | (0.68,0.73) | 0.67     | (0.63,0.7)    | 0.65  | (0.55,0.77)  | 0.89    | (0.83,0.79)  |
| <b>Demographics</b>             |       |               |       |             |          |               |       |              |         |              |
| Male (vs. female)               | 1.73  | (1.64,1.82)   | 2.27  | (1.97,2.6)  | 2.64     | (1.88,3.7)    | 1.50  | (0.94,2.41)  | 2.08    | (1.69,1.78)  |
| Single (vs. married)            | 1.07  | (1.06,1.09)   | 1.09  | (1.06,1.13) | 1.07     | (1.01,1.12)   | 1.16  | (1,1.35)     | 1.32    | (1.24,1.12)  |
| Rural (vs. urban)               | 1.05  | (1.04,1.06)   | 1.04  | (0.99,1.08) | 1.00     | (0.92,1.07)   | 1.07  | (0.9,1.27)   | 1.16    | (1.08,1.08)  |
| <b>Geographic Region</b>        |       |               |       |             |          |               |       |              |         |              |
| Northeast                       | 1.00  |               | 1.00  |             | 1.00     |               | 1.00  |              | 1.00    |              |
| Mid-Atlantic                    | 1.13  | (1.11,1.16)   | 1.10  | (1.04,1.16) | 0.92     | (0.74,1.14)   | 0.83  | (0.53,1.3)   | 1.00    | (0.87,1.18)  |
| Mid-West                        | 1.14  | (1.11,1.16)   | 1.19  | (1.12,1.27) | 1.14     | (0.99,1.31)   | 1.03  | (0.72,1.47)  | 1.20    | (1.04,1.25)  |
| South                           | 1.13  | (1.11,1.16)   | 1.13  | (1.07,1.19) | 1.19     | (1.08,1.32)   | 0.89  | (0.61,1.28)  | 1.13    | (0.99,1.2)   |
| West                            | 1.05  | (1.03,1.08)   | 1.05  | (0.98,1.12) | 1.12     | (1.01,1.25)   | 0.96  | (0.7,1.32)   | 1.23    | (1.08,1.12)  |
| <b>Comorbidity (Yes vs. No)</b> |       |               |       |             |          |               |       |              |         |              |
| Substance Abuse                 | 0.89  | (0.86,0.92)   | 0.89  | (0.84,0.94) | 0.87     | (0.78,0.96)   | 0.92  | (0.69,1.23)  | 1.20    | (1.05,0.9)   |
| Anemia                          | 1.32  | (1.29,1.34)   | 1.33  | (1.28,1.39) | 1.39     | (1.29,1.49)   | 1.36  | (1.1,1.67)   | 1.76    | (1.54,1.35)  |
| Cancer                          | 1.63  | (1.6,1.66)    | 1.88  | (1.8,1.96)  | 1.82     | (1.68,1.96)   | 2.55  | (2.03,3.2)   | 3.72    | (3.27,1.69)  |
| Cerebrovascular Dz              | 1.44  | (1.41,1.46)   | 1.52  | (1.46,1.58) | 1.66     | (1.56,1.76)   | 1.69  | (1.41,2.03)  | 1.53    | (1.34,1.59)  |

|                             |      |             |      |             |      |             |      |             |      |             |
|-----------------------------|------|-------------|------|-------------|------|-------------|------|-------------|------|-------------|
| CHF                         | 1.94 | (1.91,1.97) | 1.94 | (1.86,2.01) | 2.18 | (2.04,2.33) | 2.26 | (1.86,2.74) | 3.10 | (2.77,2.03) |
| CVD                         | 1.23 | (1.2,1.26)  | 1.22 | (1.14,1.3)  | 1.17 | (1.05,1.29) | 1.47 | (1.11,1.94) | 1.54 | (1.26,1.38) |
| Depression                  | 0.93 | (0.91,0.95) | 0.87 | (0.83,0.92) | 0.89 | (0.83,0.96) | 0.96 | (0.78,1.17) | 1.02 | (0.93,0.99) |
| Hypertension                | 1.06 | (1.05,1.08) | 1.40 | (1.33,1.47) | 1.39 | (1.29,1.49) | 1.32 | (1.08,1.6)  | 1.29 | (1.2,1.01)  |
| Hypothyroidism              | 1.07 | (1.05,1.1)  | 1.12 | (1.04,1.22) | 1.12 | (1.03,1.22) | 1.35 | (1.04,1.77) | 1.04 | (0.89,1.16) |
| Liver disease               | 1.38 | (1.34,1.42) | 1.36 | (1.28,1.44) | 1.73 | (1.59,1.89) | 1.61 | (1.18,2.21) | 2.19 | (1.91,1.54) |
| Lung Disease                | 1.46 | (1.44,1.48) | 1.46 | (1.4,1.52)  | 1.34 | (1.25,1.43) | 1.42 | (1.17,1.71) | 1.73 | (1.56,1.57) |
| Fluid/Electrolyte Disorders | 1.23 | (1.2,1.26)  | 1.27 | (1.21,1.33) | 1.44 | (1.33,1.56) | 1.11 | (0.88,1.41) | 1.55 | (1.33,1.25) |
| Obesity                     | 0.80 | (0.79,0.82) | 0.74 | (0.7,0.78)  | 0.76 | (0.69,0.84) | 0.95 | (0.73,1.24) | 0.92 | (0.83,0.84) |
| Other Disease               | 1.22 | (1.19,1.26) | 1.32 | (1.26,1.39) | 1.29 | (1.18,1.42) | 1.48 | (1.14,1.92) | 1.56 | (1.3,1.29)  |
| Psychoses                   | 0.96 | (0.94,0.99) | 1.07 | (1.01,1.13) | 1.12 | (1.02,1.24) | 1.09 | (0.83,1.44) | 1.31 | (1.11,1.15) |
| PVD                         | 1.46 | (1.44,1.49) | 1.48 | (1.42,1.54) | 1.58 | (1.48,1.68) | 1.38 | (1.12,1.7)  | 1.92 | (1.71,1.5)  |

---
